# Supplementary material for: Sun Protection and Sunburn in Children Aged 1–10 Years in Germany: Prevalence and Determinants
Source: MDPI journal article supplement (doi:10.3390/children8080668), 2021-07-31
Supplement: s1 [file s1]

**Table S1.** Determinants related to the use of sun protection measures in individual logistic regressions

|                                         | Sunscreen on the body |             | Sunscreen on the face |             | Shirt that covers shoulders |             | Cap or hat |             | Staying in the shade |             | Sunglasses |             |
|-----------------------------------------|-----------------------|-------------|-----------------------|-------------|-----------------------------|-------------|------------|-------------|----------------------|-------------|------------|-------------|
|                                         | OR                    | [95%-CI]    | OR                    | [95%-CI]    | OR                          | [95%-CI]    | OR         | [95%-CI]    | OR                   | [95%-CI]    | OR         | [95%-CI]    |
| <b>Children</b>                         |                       |             |                       |             |                             |             |            |             |                      |             |            |             |
| Sex                                     |                       |             |                       |             |                             |             |            |             |                      |             |            |             |
| Male                                    | Ref.                  |             | Ref.                  |             | Ref.                        |             | Ref.       |             | Ref.                 |             | Ref.       |             |
| Female                                  | 1.26                  | [0.84-1.88] | 1.05                  | [0.70-1.56] | 1.10                        | [0.76-1.59] | 1.04       | [0.74-1.46] | 0.92                 | [0.66-1.29] | 1.48       | [0.88-2.49] |
| Age of child                            |                       |             |                       |             |                             |             |            |             |                      |             |            |             |
| 1-3 years                               | Ref.                  |             | Ref.                  |             | Ref.                        |             | Ref.       |             | Ref.                 |             | Ref.       |             |
| 4-6 years                               | 0.40                  | [0.09-1.85] | 0.78                  | [0.24-2.54] | 0.81                        | [0.28-2.39] | 0.26       | [0.07-0.92] | 0.24                 | [0.09-0.67] | 0.43       | [0.16-1.16] |
| 7-10 years                              | 0.18                  | [0.04-0.77] | 0.39                  | [0.13-1.12] | 0.36                        | [0.13-0.94] | 0.11       | [0.03-0.38] | 0.12                 | [0.04-0.30] | 0.44       | [0.19-1.02] |
| Skin color                              |                       |             |                       |             |                             |             |            |             |                      |             |            |             |
| (Very) fair skin                        | Ref.                  |             | Ref.                  |             | Ref.                        |             | Ref.       |             | Ref.                 |             | Ref.       |             |
| Medium skin                             | 0.45                  | [0.27-0.74] | 0.40                  | [0.24-0.66] | 0.76                        | [0.51-1.15] | 0.71       | [0.48-1.03] | 0.69                 | [0.48-0.99] | 0.62       | [0.36-1.06] |
| (Very) brown skin                       | 0.14                  | [0.07-0.26] | 0.13                  | [0.07-0.25] | 0.61                        | [0.34-1.08] | 0.29       | [0.17-0.51] | 0.39                 | [0.22-0.68] | 0.68       | [0.30-1.55] |
| <b>Caregivers</b>                       |                       |             |                       |             |                             |             |            |             |                      |             |            |             |
| <b>Sociodemographic characteristics</b> |                       |             |                       |             |                             |             |            |             |                      |             |            |             |
| Sex                                     |                       |             |                       |             |                             |             |            |             |                      |             |            |             |
| Male                                    | Ref.                  |             | Ref.                  |             | Ref.                        |             | Ref.       |             | Ref.                 |             | Ref.       |             |
| Female                                  | 1.30                  | [0.87-1.94] | 1.04                  | [0.70-1.55] | 1.03                        | [0.71-1.48] | 1.47       | [1.04-2.06] | 1.11                 | [0.79-1.55] | 1.06       | [0.64-1.76] |
| Age of caregiver                        |                       |             |                       |             |                             |             |            |             |                      |             |            |             |
| 16-25 years                             | Ref.                  |             | Ref.                  |             | Ref.                        |             | Ref.       |             | Ref.                 |             | Ref.       |             |
| 26-35 years                             | 0.75                  | [0.43-1.30] | 0.81                  | [0.46-1.42] | 0.48                        | [0.28-0.83] | 0.80       | [0.51-1.26] | 0.59                 | [0.38-0.93] | 0.55       | [0.27-1.14] |
| 36-45 years                             | 0.70                  | [0.37-1.32] | 0.64                  | [0.34-1.19] | 0.47                        | [0.26-0.87] | 0.67       | [0.40-1.12] | 0.63                 | [0.38-1.06] | 1.58       | [0.79-3.19] |
| 46-55 years                             | 0.50                  | [0.24-1.03] | 0.46                  | [0.22-0.94] | 0.33                        | [0.16-0.68] | 1.16       | [0.59-2.27] | 0.92                 | [0.49-1.74] | 1.28       | [0.53-3.11] |
| 56-65 years                             | 0.86                  | [0.33-2.23] | 0.54                  | [0.23-1.28] | 0.54                        | [0.23-1.28] | 0.58       | [0.27-1.24] | 0.62                 | [0.29-1.32] | 1.12       | [0.38-3.29] |
| Immigrant background                    |                       |             |                       |             |                             |             |            |             |                      |             |            |             |
| No                                      | Ref.                  |             | Ref.                  |             | Ref.                        |             | Ref.       |             | Ref.                 |             | Ref.       |             |

|                                            |      |             |      |              |      |             |      |             |      |             |      |             |
|--------------------------------------------|------|-------------|------|--------------|------|-------------|------|-------------|------|-------------|------|-------------|
| Yes                                        | 0.52 | [0.31-0.87] | 0.54 | [0.33-0.90]  | 0.74 | [0.45-1.22] | 0.74 | [0.46-1.19] | 0.75 | [0.47-1.21] | 2.58 | [1.43-4.66] |
| School education                           |      |             |      |              |      |             |      |             |      |             |      |             |
| Low                                        | Ref. |             | Ref. |              | Ref. |             | Ref. |             | Ref. |             | Ref. |             |
| Medium                                     | 1.19 | [0.61-2.34] | 1.16 | [0.60-2.25]  | 0.96 | [0.49-1.89] | 1.05 | [0.58-1.91] | 1.46 | [0.81-2.62] | 0.66 | [0.30-1.45] |
| High                                       | 1.32 | [0.72-2.39] | 1.32 | [0.73-2.38]  | 0.73 | [0.44-1.43] | 0.84 | [0.50-1.43] | 1.24 | [0.74-2.09] | 0.49 | [0.24-0.99] |
| Employment status                          |      |             |      |              |      |             |      |             |      |             |      |             |
| Unemployed                                 | Ref. |             | Ref. |              | Ref. |             | Ref. |             | Ref. |             | Ref. |             |
| Part-time                                  | 1.54 | [0.80-2.97] | 1.54 | [0.80-2.94]  | 1.24 | [0.65-2.37] | 0.87 | [0.47-1.61] | 0.78 | [0.43-1.40] | 1.79 | [0.64-4.97] |
| Full-time                                  | 1.61 | [0.88-2.95] | 1.74 | [0.96-3.16]  | 0.97 | [0.54-1.75] | 0.74 | [0.41-1.29] | 0.84 | [0.49-1.44] | 1.60 | [0.61-4.25] |
| Area of residence                          |      |             |      |              |      |             |      |             |      |             |      |             |
| North                                      | Ref. |             | Ref. |              | Ref. |             | Ref. |             | Ref. |             | Ref. |             |
| South                                      | 0.71 | [0.38-1.33] | 0.89 | [0.49-1.63]  | 1.53 | [0.87-2.67] | 1.26 | [0.76-2.10] | 0.68 | [0.41-1.12] | 0.77 | [0.38-1.55] |
| West                                       | 0.99 | [0.52-1.89] | 1.26 | [0.68-2.35]  | 1.07 | [0.62-1.84] | 1.13 | [0.68-1.88] | 0.87 | [0.53-1.43] | 0.67 | [0.33-1.37] |
| East                                       | 0.52 | [0.26-1.02] | 0.57 | [0.30-1.11]  | 0.83 | [0.45-1.52] | 1.01 | [0.57-1.80] | 0.61 | [0.34-1.09] | 0.61 | [0.26-1.42] |
| Skin characteristics and tanning behaviors |      |             |      |              |      |             |      |             |      |             |      |             |
| Skin type                                  |      |             |      |              |      |             |      |             |      |             |      |             |
| I                                          | Ref. |             | Ref. |              | Ref. |             | Ref. |             | Ref. |             | Ref. |             |
| II                                         | 0.37 | [0.14-0.99] | 0.84 | [0.36-1.99]  | 0.56 | [0.27-1.18] | 0.61 | [0.32-1.19] | 0.96 | [0.52-1.77] | 0.49 | [0.21-1.12] |
| III-IV                                     | 0.32 | [0.12-0.84] | 0.50 | [0.22-1.10]  | 0.57 | [0.28-1.15] | 0.53 | [0.28-0.98] | 0.89 | [0.51-1.59] | 0.43 | [0.20-0.93] |
| V-VI                                       | 0.20 | [0.07-0.56] | 0.29 | [0.12-0.72]  | 0.52 | [0.23-1.20] | 0.49 | [0.23-1.04] | 1.18 | [0.58-2.37] | 1.14 | [0.48-2.73] |
| Current tanning bed use                    |      |             |      |              |      |             |      |             |      |             |      |             |
| No                                         | *    | -           | Ref. |              | Ref. |             | Ref. |             | Ref. |             | Ref. |             |
| Yes                                        | -    | -           | 7.12 | [0.95-53.23] | 0.80 | [0.34-1.91] | 1.36 | [0.57-3.23] | 0.98 | [0.43-2.23] | 0.29 | [0.04-2.21] |
| Intentional outdoor tanning                |      |             |      |              |      |             |      |             |      |             |      |             |
| never                                      | Ref. |             | Ref. |              | Ref. |             | Ref. |             | Ref. |             | Ref. |             |
| on 1 occasion                              | 1.00 | [0.39-2.57] | 0.85 | [0.33-2.16]  | 0.78 | [0.32-1.93] | 0.68 | [0.29-1.60] | 1.39 | [0.60-3.21] | 1.15 | [0.36-3.70] |
| on 2 occasions                             | 1.79 | [0.72-4.49] | 1.31 | [0.54-3.19]  | 1.43 | [0.60-3.39] | 0.92 | [0.41-2.05] | 0.59 | [0.27-1.29] | 1.00 | [0.34-2.98] |
| on 3 occasions                             | 1.15 | [0.52-2.56] | 1.23 | [0.55-2.74]  | 0.94 | [0.44-2.02] | 0.74 | [0.36-1.54] | 0.87 | [0.43-1.76] | 0.75 | [0.28-2.05] |
| Role model                                 |      |             |      |              |      |             |      |             |      |             |      |             |

|                 |      |             |      |             |      |             |      |             |      |             |      |             |
|-----------------|------|-------------|------|-------------|------|-------------|------|-------------|------|-------------|------|-------------|
| rather disagree | Ref. |             |
| rather agree    | 4.49 | [2.75-7.31] | 3.35 | [2.06-5.45] | 1.31 | [0.80-2.15] | 3.01 | [1.87-4.85] | 2.42 | [1.47-3.99] | 1.49 | [0.68-3.23] |

n=554 individuals 16-65 years of age who participated in wave 2020 of the National Cancer Aid Monitoring (NCAM) and reported living in the same household as at least one child aged between 1 and 10 years

Ref.=Reference category, OR=Odds Ratio, CI=Confidence Interval

\* Excluded in this analysis due to low case number

**Table S2.** Determinants related to the use of  $\geq 4$  sun protection measures in individual logistic regressions

|                                                   | OR [95%-CI]      |
|---------------------------------------------------|------------------|
| <b>Children</b>                                   |                  |
| Sex                                               |                  |
| Male                                              | Ref.             |
| Female                                            | 1.21 [0.87-1.70] |
| Age of child                                      |                  |
| 1-3 years                                         | Ref.             |
| 4-6 years                                         | 0.20 [0.06-0.69] |
| 7-10 years                                        | 0.09 [0.03-0.29] |
| Skin color                                        |                  |
| (Very) fair skin                                  | Ref.             |
| Medium skin                                       | 0.64 [0.44-0.92] |
| (Very) brown skin                                 | 0.26 [0.15-0.46] |
| <b>Caregivers</b>                                 |                  |
| <b>Sociodemographic characteristics</b>           |                  |
| Sex                                               |                  |
| Male                                              | Ref.             |
| Female                                            | 1.25 [0.90-1.76] |
| Age of caregiver                                  |                  |
| 16-25 years                                       | Ref.             |
| 26-35 years                                       | 0.52 [0.33-0.82] |
| 36-45 years                                       | 0.51 [0.30-0.86] |
| 46-55 years                                       | 0.62 [0.33-1.19] |
| 56-65 years                                       | 0.49 [0.23-1.05] |
| Immigrant background                              |                  |
| No                                                | Ref.             |
| Yes                                               | 0.64 [0.40-1.03] |
| School education                                  |                  |
| Low                                               | Ref.             |
| Medium                                            | 1.03 [0.57-1.86] |
| High                                              | 0.80 [0.48-1.34] |
| Employment status                                 |                  |
| Unemployed                                        | Ref.             |
| Part-time                                         | 1.18 [0.66-2.13] |
| Full-time                                         | 1.16 [0.67-1.99] |
| Area of residence                                 |                  |
| North                                             | Ref.             |
| South                                             | 0.89 [0.54-1.48] |
| West                                              | 1.12 [0.68-1.85] |
| East                                              | 0.61 [0.34-1.09] |
| <b>Skin characteristics and tanning behaviors</b> |                  |
| Skin type                                         |                  |
| I                                                 | Ref.             |
| II                                                | 0.44 [0.23-0.85] |
| III-IV                                            | 0.42 [0.23-0.79] |
| V-VI                                              | 0.37 [0.18-0.78] |
| Current tanning bed use                           |                  |
| No                                                | Ref.             |
| Yes                                               | 1.76 [0.74-4.18] |
| Intentional outdoor tanning                       |                  |

|                   |                  |
|-------------------|------------------|
| never             | Ref.             |
| on 1 occasion     | 0.91 [0.39-2.12] |
| on 2 occasions    | 0.86 [0.39-1.89] |
| on 3 occasions    | 0.77 [0.38-1.58] |
| <hr/>             |                  |
| <b>Role model</b> |                  |
| rather disagree   | Ref.             |
| rather agree      | 4.27 [2.54-7.18] |
| <hr/>             |                  |

n=554 individuals 16-65 years of age who participated in wave 2020 of the National Cancer Aid Monitoring (NCAM) and reported living in the same household as at least one child aged between 1 and 10 years

Dependent variable: applying  $\geq 4$  protection measures when staying outside on a sunny summer day for longer than 10 minutes based on median split

OR = odds ratio; CI = confidence interval; Ref. = reference category

**Table S3.** Determinants related to sunburn in children (at least one sunburn in the past 12 months)

|                                                   | OR [95%-CI]       |
|---------------------------------------------------|-------------------|
| <b>Children</b>                                   |                   |
| Sex                                               |                   |
| Male                                              | Ref.              |
| Female                                            | 1.03 [0.69-1.55]  |
| Age of child                                      |                   |
| 1-3 years                                         | Ref.              |
| 4-6 years                                         | 3.66 [0.81-16.63] |
| 7-10 years                                        | 5.01 [1.18-21.29] |
| Skin color                                        |                   |
| (Very) fair skin                                  | Ref.              |
| Medium skin                                       | 0.80 [0.52-1.24]  |
| (Very) brown skin                                 | 0.69 [0.35-1.37]  |
| <b>Caregivers</b>                                 |                   |
| <b>Sociodemographic characteristics</b>           |                   |
| Sex                                               |                   |
| Male                                              | Ref.              |
| Female                                            | 0.69 [0.46-1.04]  |
| Age of caregiver                                  |                   |
| 16-25 years                                       | Ref.              |
| 26-35 years                                       | 0.87 [0.51-1.48]  |
| 36-45 years                                       | 0.95 [0.52-1.76]  |
| 46-55 years                                       | 0.88 [0.40-1.92]  |
| 56-65 years                                       | 1.57 [0.69-3.60]  |
| Immigrant background                              |                   |
| No                                                | Ref.              |
| Yes                                               | 1.01 [0.57-1.78]  |
| School education                                  |                   |
| Low                                               | Ref.              |
| Medium                                            | 0.45 [0.23-0.89]  |
| High                                              | 0.51 [0.29-0.91]  |
| Employment status                                 |                   |
| Unemployed                                        | Ref.              |
| Part-time                                         | 1.39 [0.67-2.89]  |
| Full-time                                         | 1.51 [0.69-3.29]  |
| Area of residence                                 |                   |
| North                                             | Ref.              |
| South                                             | 0.78 [0.44-1.40]  |
| West                                              | 0.78 [0.43-1.38]  |
| East                                              | 0.46 [0.22-0.96]  |
| <b>Skin characteristics and tanning behaviors</b> |                   |
| Skin type                                         |                   |
| I                                                 | Ref.              |
| II                                                | 1.08 [0.52-2.22]  |
| III-IV                                            | 0.88 [0.44-1.75]  |
| V-VI                                              | 0.86 [0.36-2.02]  |
| Current tanning bed use                           |                   |
| No                                                | Ref.              |
| Yes                                               | 0.74 [0.24-2.24]  |
| Intentional outdoor tanning                       |                   |

|                   |                  |
|-------------------|------------------|
| never             | Ref.             |
| on 1 occasion     | 1.11 [0.30-3.99] |
| on 2 occasions    | 2.01 [0.64-6.32] |
| on 3 occasions    | 2.43 [0.83-7.01] |
| <hr/>             |                  |
| <b>Role model</b> |                  |
| rather disagree   | Ref.             |
| rather agree      | 0.76 [0.44-1.30] |
| <hr/>             |                  |

n=554 individuals 16-65 years of age who participated in wave 2020 of the National Cancer Aid Monitoring (NCAM) and reported living in the same household as at least one child aged between 1 and 10 years  
OR = odds ratio; CI = confidence interval; Ref. = reference category
